# Supplementary material for: C2orf69 mutations disrupt mitochondrial function and cause a multisystem human disorder with recurring autoinflammation
Source: JCI journal article supplement (doi:10.1172/jci143078), 2021-05-04
Supplement: sd2 [file 2]

## Reporting Checklist

The paper does not present data from a clinical trial/study. Therefore, the reporting checklist is not applicable. Ethic approvals are listed in the methods section of the manuscript.
